# Supplementary material for: Mir221/222 drive synovial hyperplasia and arthritis by targeting cell cycle inhibitors and chromatin remodeling components
Source: eLife journal article supplement (doi:10.7554/elife.84698), 2024-07-24
Supplement: fig4-data2 [file Figure 4-Source data 2.xlsx]

## Sheet: Mir221-222 targets Venn  diagr
downregulated genes from huTNFtg compared to WT and huTNFtg;TgColVI-miR-221/222 compared to huTNFtg SFs	DIANNA predicted targets	Pictar predicted targets	Targetscan predicted targets
Tmem26	Bmf	Rims3	Lifr
Fxyd6	Zfp652	Aip1	Ddit4
Mest	Irx5	Nap1l5	Atpaf1
Steap3	Ranbp9	Hectd2	Paip2
Aspg	Rgs6	Tox	Mylip
Scg2	Rims3	Tcf12	Hectd2
Sox9	Insig1	Dyrk1a	Arhgap32
Eln	Pi15	Ube2e3	Pvrl1
Fbln7	Tlk1	Cdkn1b	Ube2g1
Arsi	Rbm24	Rap1b	Rgs8
Nrxn2	Cacnb4	Ctcf	Gnai3
Il1rn	Dmrt3	Flj39155	2510009E07Rik
Crispld2	Spred2	Wnt1	Zfp113
Cyp26b1	Gabra1	Ddr1	Rbm24
Ppp1r3c	Brwd3	Rbm24	Pafah1b1
Scn7a	Kit	Coas2	Shprh
Dnmt1	Igf2bp2	Sdc2	Rab1
Acan	Hectd2	Ina	Kit
Igfbp4	Cd4	Fbxo22	Ntf3
Ibsp	Etv3	Loc92558	Irx5
Id3	Dcaf12	Vapb	Tle3
Kcne4	Bcl2l11	Ets1	Igsf3
Car12	Ankrd29	Bmi1	Rfx7
Ahrr	Bbc3	Mat2a	Zbed5
Gpx3	Fndc3a	Map3k10	Btg2
Tsc22d1	Mylip	C10orf86	Rfk
Itga1	Sbk1	Usp21	Wdpcp
Sned1	Phf2	Ntf3	Dmrt3
Gas1	Rfx3	Pigf	Psma8
Cebpa	Sema6d	Safb	Ap3b2
Aqp2	Tet1	Osbpl7	Slco1a4
Cilp	Pdcd10	Sncb	Cdkn1b
Stc1	Itgb2l	Stk17b	Gabra1
Slc30a3	Ralgapa1	Cdkn1c	Lcor
Pgam2	Arf4	Adam11	Nap1l5
Palmd	Hipk3	Dbccr1l	Vapb
Slc1a3	Ppp6c	Mscp	Eif3j1
St5	Sacm1l	Bicd2	Arf4
Comp	Pcdha10	Atp1a1	Megf9
B3gnt8	Stac	Tmem25	Atad2b
Cks1brt	Plekha2	Sema6d	Ammecr1
Apoe	Helq	Cdk11	Ppp3r1
Plekhg4	Nfyb	Pbx3	Ina
Flot1	Ppp3r1	Kiaa0252	Plcl2
Gprin3	Pkdcc	Cpeb4	Cdk19
Pparg	Nap1l5	Pdcd10	Asph
Gldn	Dfna5	Flj13089	Usp27x
Ildr2	Ankib1	Ankhd1	Ccdc64
Ephb3	Nlk	Znf385	Styx
Dpt	Ccdc64	Rbbp7	Cd164
Ank3	E130309F12Rik	Dhx15	Fam214a
Gm765	Tead1	Fos	Fos
Depdc1a	Fos	Bbx	Pdzrn4
Dlk1	Cabyr	Rsbn1l	Clvs2
Bmp5	Arid1a	Irx5	E130309F12Rik
Pcolce2	Lmx1a	Rfx3	Irf2
Itga9	Rc3h2	Exoc8	Crebzf
Stmn1	Txlng	Htr7	Sesn3
Id2	2510009E07Rik	Pggt1b	Myo10
Cdsn	Zfp36l2	Amph	Brwd3
Cacna1a	Paip1	Ppp6c	Qk
Rai2	Trabd2b	Mapk10	Tmcc1
Id1	BC052040	Ube2j1	Agps
Ednrb	Tox	Rala	Map3k14
Fgfr3	Btg2	Insig1	Zfp385a
Gatb	Ube2j1	Gnai2	Gal3st4
Ggt5	Eif5a2	Mesdc1	Kif16b
Galnt9	Snap25	Plxnd1	Cdv3
Tcf7l1	Upf3b	Arf4	Eif5a2
Id4	Irf2	Kns2	Eif3j2
Ddit4l	Tmcc1	Wdr40a	Foxn2
Fzd4	Ptbp2	Paip1	S100pbp
Tmem158	Crebzf	Notch3	Sncb
Deptor	Ets1	Dmrt3	Cpped1
Plxna4	Mllt6	Dnajc14	Etv3
Nov	Nipal4	Hoxc10	Cdkn1c
Kitl	Mipol1	Dbn1	Bbc3
Samd5	Trhde	Khdrbs2	Fry
Gm9780	Gbx2	Cyr61	Gja1
Efs	E130114P18Rik	Sfrp2	Dcun1d1
Ccno	Zfp385a	Flj13576	Mier3
Matn4	Kif16b	Dach1	Lrrtm2
Npy	Fam208a	Irf2	Zim1
Maf	Tsc22d3	Morf4l1	Hnrnpa3
St6galnac2	Ntf3	Smarca1	Dpp8
Oxtr	Mesdc1	Paip2	Galnt18
Ackr4	Stmn1	Nrk	Fadd
Ly6a	Megf9	Plekhc1	Sun2
Egfl6	Zcchc4	Cd4	Sema6d
Ebf2	Pogz	Plcg1	Midn
Abcc9	Zfpm2	Flj20366	Lmx1a
Nkd1	Rpap1	Rbms1	Ptbp3
C1qtnf3	Rab1	Zfpm2	Sox1
Ppp2r2b	Ywhag	Osbpl3	Itgb3
Hmgcll1	Prune	Sema4g	Aadacl3
Olfml3	Eif3j1	Gnao1	Nfyb
Lgr5	Plcl2	C20orf23	Mex3a
Asic3	Fam214a	Flj31434	Sbk1
Igf2	Nkiras1	Bnip3l	Fndc3a
Matn2	Arnt	Garnl1	Ets2
Chrdl1	Vezf1	Efo1	Arnt
Ly6c1	Spata31	Hoxb5	Tox
Cdc25b	G6b	Vgll4	Rc3h2
Gldc	Ddx3x	Rad9b	Cacnb4
Megf6	Camk1d	Pak1	Adam11
Scube2	Cdk19	Flot2	Pde3a
Slc6a2	Sun2	Znf278	Mapk6
Prickle1	Efcab14	Prg-3	Nrg1
Anpep	Wdr47	Hrb	Wdr47
Susd2	Mier3	Kiaa1036	H3f3a
Dcaf12l1	Ube2e3	Unc84b	Gpm6a
Ganc	Ptchd4	Rkhd3	Car2
Lpl	Pvr	Snap25	Vgll4
Vegfd	Hmgcs1	Ndel1	Timp3
Mfap1a	Larp4b	Angptl2	Bmp2k
Otor	Zfp946	Zfhx1b	Gtf2a1
Brca2	Atpaf1	Asb7	Wdr37
Kng1	Paip2	Flj10159	Adipor1
Aspn	Ikzf4	Whsc1	Cnot2
Mastl	Rad51c	Fat2	Gucy1a2
Dbf4	Copa	Pten	Add3
S1pr1	Tmem236	Dhx35	Nlk
Nnmt	Hdgf	Dlx1	Fmr1
Fbxo5	Gpr155	Flj25476	Trabd2b
Kif2c	Brd8	Arid1a	C8a
Cdk19	AI593442	Myo10	Ank2
Myzap	Frmd7	Hshin1	Agfg1
Igf1	Ctsb	Cpne8	Chsy1
Cdkn2d	Ptprz1	Rnf3	Cd4
Plxna2	Ammecr1	Eif3s1	Emx2
Peli2	Zim1	Ppp1r8	Angptl2
Atp12a	Thsd7b	Mylip	Vezf1
Gdf10	Hipk1	Klf12	Hipk1
Ticrr	Klc1	Tmem16a	Zfpm2
Kazald1	Adam11	Meis1	Camk1d
Clspn	AA987161	Gnai3	Fermt2
Clec11a	Hnrnpa3	Phf2	Ets1
Mrgprf	Lrfn2	Imp-2	Cbfb
Setd3	Nfatc3	Ap1g1	Fam53b
Cd24a	Tbx22	Hsyn	Vash1
Arxes1	Ppp1r1c	C6orf134	Nrk
Smoc1	Prnd	Eif5a2	Atp1b1
Pde3b	Gm28045	Abcc5	Bcl2l11
Mb21d1	Bzw1	Loc284058	Prune
C2cd2	Gnai2	Rab1a	Gab1
S100b	Lifr	Cbfb	Khdrbs2
Trabd2b	Tcf12	Cnr1	AI593442
Sec14l2	Trps1	Nbea	Dennd1b
Tmtc1	Dennd4a	Peli1	Atxn1
Adra1b	Fnip2	Slc4a4	Zmym2
Fbxo2	Braf	Fndc3	Cpne8
Gpr27	Dennd1b	Zf	Cldn25
Creb5	Timm21	Rsbn1	Hipk2
Mkx	Ccl20	Kiaa1598	Ralgapa1
Nrm	Haus4	Esr1	Pogz
Hip1	Pdzrn4	Gpr51	Pcdha10
Sema6d	Zfp113	Nlk	Sec23ip
Tk1	Btn1a1	Atxn1	Hoxc10
Serpinb1a	Clec1a	Ets2	Nanos1
Chil1	Axin2	Fusip1	Esr1
Sox6	Ctnna2	Hmgcr	Ctcf
Cdkn1c	Atxn1	Usp32	Zfp652
Cenpm	Uri1	Slc1a2	Plekha2
Col8a2	Galnt13	Flj10546	Smarca5
Crocc2	Bend4	Loc220594	Naa25
Neurl1b	Fstl5	Pcdha	Wnk3
Fars2	Chd2	Flj35954	Slc4a4
Gdpd2	Hook1	H41	Pdgfa
Scarf2	Gm5591	Arnt	Lclat1
Clu	Klrb1f	Pogz	Sec62
Mlf1	Magi2	Kiaa0779	Msl2
Wnt16	Fbxo43	Tead1	Pbx3
Pradc1	Ddx27	Kiaa0553	Chd7
Ecm2	Spats2l	Pou3f2	Mesdc1
Dlx2	Slc1a2	Kiaa1078	Prrg3
Tedc1	Lrrtm2	Dkfzp667b0210	Slc2a12
Tnfrsf21	Peli1	Ogt	Rnf44
Cubn	Cdkn1b	Ywhag	Tiparp
Ezh2	Bmpr1a	Sox4	Itgb8
Aoc3	Gata1	Htlf	Tcf12
Kif23	Nipal2	Bmf	Vkorc1l1
Rbm46	Shox2	Flj11011	Rnps1
Rnf125	Mybl1	Ppargc1a	Lrfn2
Lin54	Rgs8	Foxj3	Rims3
Arid4b	Gnai3	C1orf22	Smndc1
Mns1	Mex3a	Usp6	Ikzf4
Sesn1	Fermt2	Timp3	Ptchd4
Aqp5	Crygb	Hipk1	Rgs17
Amer1	Gm13088	Hdac4	Ipo7
Pla2g5	Tet2	Stk4	Wls
Evx2	Socs4	Shank2	Slitrk5
Cpeb3	Rev3l	Trps1	E2f2
E2f7	Eif4e3		Zfand5
Dbndd2	Cbfb		Chd2
Lysmd3	D1Ertd622e		Slc25a37
Hivep3	Ndel1		Trps1
Epb41l4b	Agps		Usp7
Kif11	Vapb		Clint1
Tenm4	Ddx60		Ranbp2
Rad54l	Sdc2		Igf2bp2
Cenpn	Sybu		Arid1a
Mertk	Harbi1		Tmem51
Kif20b	A730071L15Rik		Tcf7l2
Foxp2	Hsd17b1		Lhx8
Sncaip	Cux1		Cdh2
Zfhx4	Rala		Axin2
Sp7	Bmp2k		Braf
Cobll1	Smarca5		2900011O08Rik
Tshz1	Hoxc10		Fnip2
Pcsk5	Msl2		Fgf14
Cygb	Usp27x		Mdm4
Sfrp2	Tbl1xr1		Chfr
Elfn1	Fktn		Piezo2
Dtl	Mysm1		Tor1aip1
Gpr88	H3f3a		Ap3m1
Abca7	Nedd1		Tbx15
Plin4	Lpar3		Srsf2
Snapc5	Dpp8		Gbx2
St8sia2	Sowahc		Nfatc3
Galnt16	Map7d2		Phf12
Acot1	Zeb2		Dhx36
Mis18bp1	Rnf13		Amigo1
Efcab11	Gnb4		Klf7
Ttf2	Ralgapa2		Myt1l
Wwc1	Ptx3		Mapre1
Gramd2	Wdfy1		Phc2
Drp2	Hnrnpa0		Dkk2
Atp1b1	Cdv3		Zfp326
Mid2	Magi1		Il1rapl1
Reps2	Fbxo28		AI314180
Flvcr2	Gria4		Coa5
Draxin	Rrm2b		Runx2
Cdkl5	Eml6		Pura
Neurl1a	Hs6st2		Ankhd1
Mpped2	Smoc1		Phf2
Cdkn3	Grm2		Nr2c2
Eef2kmt	Pydc4		Hmbox1
Alpl	Zfyve20		Gnai2
Nmral1	Erbb4		Mia3
Ccnf	Pgap1		Marcks
Rnf39	Abcc5		Lhfpl2
Ndc80	Crhbp		Map3k10
Fxyd1	Smarca1		Nkiras1
Rps6ka6	Gnb3		Atf7
Cdh5	Zbtb20		Ajap1
Sema3e	Tcf4		Tcf4
Rad51c	Agfg1		Mllt6
Kntc1	Rfx6		Caprin2
Mtus1	Terf2ip		Canx
Frzb	Gm4944		Gpr165
Wnt4	Pcdh10		Usp6nl
Stk26	U2surp		Dnal1
Gm10260	D10Wsu102e		Ppp1r15b
Col9a2	Prr14l		Eif4e3
Pde8b	Dennd5b		Thrb
Gfra1	Cetn4		Eml6
Tmcc3	Zbed5		Ywhag
Tmem170	Igsf3		Ythdc1
Mxd3	Pcdhb11		Ube2j1
Ncapg	Cnr1		Mapk10
Gzmc	Rcbtb2		Tbc1d22b
Zfp442	Fmr1		Uri1
Bambi	Mex3b		Frrs1l
Shroom3	Cnih4		Rph3a
Sfrp4	Golga3		8030462N17Rik
Lrrc75b	Nus1		Rsbn1l
Esco2	Vkorc1l1		Fam208a
Slc25a29	Foxn2		Erbb4
Csrnp2	4930481A15Rik		Sh3pxd2b
Prdm16	Oprl1		Zfp618
Chn1	Gpm6a		Nyap2
Sox8	Khdc1c		BC030336
Fap	Spata6		Cttn
Ska3	Sptssa		Ttc28
Accs	Ddit4		Dnaja2
Irak1bp1	Mark1		Cdk8
Flywch2	Rfk		Dnajc14
Rps6	Rab3a		Zeb2
St8sia4	Dpysl5		Ankrd52
Trbc2	Gm9978		Ptbp2
Pex12	Cdkn1c		Bend4
Spsb2	Kirrel3		Spats2l
Zfp300	Asb4		Stox2
Zfp605	Rfx7		Tacc1
Lman1l	5330438I03Rik		Elavl2
Cit	Il5		Fam167a
Kiss1r	Atf7		Zadh2
Sult4a1	Med12l		Bcl11b
Slc38a4	Itih5		Ppp2r2a
Plp1	3110057O12Rik		Zfhx3
Nckap5	Crisp4		Spata6
Xndc1	Gtf2a1		Cmtm4
Zc3h12b	Stk17b		Arrdc3
Kcnab2	Kcnh7		Zbtb39
Knl1	Adsl		Spred2
Htr7	Zfp420		Dnajc3
Sbspon	Slc25a37		Aak1
Cav3	Slc2a12		Rfx3
Tmem100	Cwf19l2		Ccdc171
Utp14b	Ccser1		Gab2
Tubgcp6	Adcy1		Foxp2
Elmo1	Angptl2		Nipal4
Npnt	Pgbd1		Paip1
Thbs4	Atad2		Luc7l3
Hspa8	Nedd4l		Mgat4a
Igfbp2	Ssbp3		Pak1
Bmp4	Map3k10		Dcaf12
Ammecr1	Zadh2		Prkacb
Prg4	Midn		Cc2d1b
Aldh2	Cd2ap		Slc38a1
Pdlim2	Brinp3		Mfn2
Akr1e1	Ankrd52		Foxp1
Ogn	Capn7		Baz2b
Atf4	Npat		Kmt2c
Cfb	Agtr1a		Hipk3
Phldb2	Ros1		Sema3b
Prdx3	Rbm11		Ppargc1a
Agtr1a	Cpeb4		Osbpl7
Dync1h1	Fam63b		Slc6a1
Cdkn1b	Tle3		Fat2
Adm	Trp53inp1		Chmp4b
Cacng7	Rgs21		Mark1
Gadd45a	Iqgap2		Slc30a6
Ndnf	Bcl2l13		Elp4
Ccdc25	Prdx6b		C2cd2
Rasa3	Lrrc49		Trove2
Tnn	Itgb3		Atxn7
Cdkn2a	Gpr180		Pkdcc
Rbm45			Kcnh7
Tmem176b			Tet1
Rspo2			Slc1a2
Ddah2			Ghr
Angpt4			Snx29
Cbr2			Fbxo28
H2-K1			Rsf1
Cfl1			St8sia1
Tmem263			Meis1
Psmb10			Ankib1
Mmp23			Fbn2
Casp12			Grm1
Nupr1			Ptchd1
Pth1r			Sh3bp4
S100a13			Tnrc6c
Mmp13			Smad4
Arpc3			Frs2
Reep5			Azi2
Pknox2			Dgke
Rcan2			Prdm11
Igsf10			Ubn2
Col14a1			Zfp36l2
Ggps1			1110002E22Rik
Slc16a2			Nbeal1
Actr3b			Fam222b
Rps24			Nova1
Hoxd13			Map3k13
Hps6			Slc16a12
Furin			Bmf
Pygl			Tmf1
Il11ra1			Stx1b
Mapk1ip1			Nufip2
Rbpms2			Cd2ap
Tmem127			Swt1
Tmem5			Shank2
Npr2			Rreb1
Irf1			Camta1
Lrp4			Adam22
Rps8			Pdik1l
Zfp398			Usp9x
Gbf1			Zyx
Tsr3			Snap29
Col10a1			Kansl1
Heca			Rab3gap2
Vezt			Slc2a2
Aldh1a2			Gpbp1
Isoc2b			Cers4
Lum			Rnf165
Naglu			Gm996
Ecsit			Mon2
Med7			Plekha6
Mrc2			Dlg2
Adamts4			Obfc1
Lrrk1			Fam120a
Ercc5			Oxa1l
Plxdc2			Arhgef7
Pamr1			Tlk1
Lpar1			Fign
Atg4c			Map3k2
Lyz2			Socs7
Ndufa5			Rrp12
Drosha			Il34
Pdp1			Cenpo
Angptl7			Sptssa
Ypel3			Commd1
Ctsc			Slc16a6
B230118H07Rik			Zfp593
Pik3ip1			Nnt
Polr3gl			Loxl3
Herc4			Mterfd3
Gria3			Malsu1
Cpxm2			Bysl
Dlg3			Ndfip1
Prkag2			Mios
Cdk10			Cox5a
Rnaset2b
Rgl3
Trp53inp1
Lifr
Ccl20
Man1c1
Necap1
Zbtb7c
Ifi44
Trim8
Sart1
Dnajc13
Rpl5
Ctsh
Cdkn2b
Zbtb9
Ebp
A4galt
Col2a1
Cyp51
Tnfsf12
Ankrd1
Xpa
Itgbl1
Smarca1
Plce1
Aldh4a1
Gcnt4
Zfp317
Adra2a
Noct
Edil3
Lamtor2
Rhob
Rrn3
Hacd2
Mtfmt
Msr1
Poli
Znhit6
Prdm2
Ubxn8
Cxcl16
Ptprn
Lcp1
Tada2a
Wif1
Ssh3
Tlr6
Usp27x
Epb41l1
Setd7
Gas7
Arhgap31
Tmem246
Tle2
Cdo1
Dio3
Abr
Swap70
Zbtb34
Omd
Taf1b
Zfp775
Crebl2
Erap1
B2
Cd2ap
Leng8
Acot13
Greb1
Angptl4
Nacc1
Hp
Hpgd
Mef2c
Smim20
Mr1
Dstyk
Sema3b
Fabp7
Coch
Adam8
Nptxr
0610009O20Rik
Zfp608
Sdad1
Myl12b
Pcdhb17
Tpcn1
Akna
Nhs
Cyp2j6
Gprasp1
Rfesd
Efl1
Zfp467
Ino80
Cog7
2200002D01Rik
Zfyve1
Egr2
Rmdn1
Srgap1
Pdcd2
Bloc1s5
Cavin4
Azin2
Cep350
Simc1
Ccl8
Plekhn1
Clip3
Nox4
Glipr1
Cd68
Tbc1d9b
Mon1b
Tinagl1
Slfn5
Leng1
Cyb561d2
Ankrd16
Pik3c3
Zfp810
Rpl4
Tet2
Klhl33
Plpp6
Calcoco1
Ddx31
Sh2d4a
Vit
Rab30
Tmem131l
Tmem86a
Aamdc
Hivep2
Tbc1d22a
Rnaseh2b
Ccdc122
Pcsk6
Arhgap17
Sord
Btbd3
Plekha1
Flt4
Prag1
Osr2
Pop4
Isca2
Tenm3
Aldh5a1
Gpnmb
D3Ertd751e
Def6
Parp4
Gtf2h3
Gas2
Zfp846
Isg20
Zfp747
Hfe
Frg1
Ints12
Gdf11
Optn
Btrc
Eng
Ggct
Nrg1
Dgka
Pdss2
Zfp386
Stk25
Wdr59
Vegfb
Lama5
Sfn
Vti1a
Fkbpl
Spg11
Mettl21b
Prune2
Gnl2
Pyroxd1
Casp4
Ggact
Tyw5
Dpp7
Miip
Rps15a
Apobr
Nphp1
Paqr7
Wnt10b
Kiz
BC022687
Gpatch2l
Gm5617
Mcts2
Synm
Cela1
Flad1
Zfp933
Mdk
Specc1
Fktn
Mnda
H2-M3
Disp1
Nmnat2
Nudt9
