# Supplementary material for: Mir221/222 drive synovial hyperplasia and arthritis by targeting cell cycle inhibitors and chromatin remodeling components
Source: eLife journal article supplement (doi:10.7554/elife.84698), 2024-07-24
Supplement: fig4-data3 [file Figure 4-Source data 3.xlsx]

## Sheet: UP_TgC_vs_TNFtg_KEGG_2019_Mouse
Term	Overlap	P-value	Adjusted P-value	Old P-value	Old Adjusted P-value	Odds Ratio	Combined Score	Genes	Type
Cell cycle	13/123	1.5777e-08	4.78043e-06	0	0	7.65877	137.588	CDKN2D;GSK3B;PLK1;CDC6;ORC6;RBL1;CDC45;CCNE2;CCNE1;MCM4;MCM5;MCM6;SKP2	Up
DNA replication	1935-05-01	0.000111635	0.0169127	0	0	10.352	94.2057	POLA1;POLD1;MCM4;MCM5;MCM6	Up
Cellular senescence	8/185	0.00425831	0.430089	0	0	3.13357	17.1058	MAP2K3;IL6;RBL1;CCNE2;CCNE1;MYBL2;CALM2;SIRT1	Up
Cushing syndrome	7/159	0.00666335	0.504749	0	0	3.19023	15.9867	NR4A1;GSK3B;FZD3;NCEH1;CCNE2;CCNE1;FZD4	Up
Signaling pathways regulating pluripotency of stem cells	6/137	0.01197	0.725381	0	0	3.1736	14.0443	GSK3B;FZD3;FZD4;LIF;ID3;FGF2	Up
Breast cancer	6/147	0.0164479	0.83062	0	0	2.9577	12.1489	GSK3B;FZD3;FZD4;TNFSF11;FGF2;ESR1	Up
Gastric cancer	6/150	0.0179898	0.778703	0	0	2.89855	11.6462	GSK3B;FZD3;CCNE2;CCNE1;FZD4;FGF2	Up
TNF signaling pathway	5/110	0.018283	0.692467	0	0	3.29381	13.1811	MAP2K3;IL6;LIF;MAP2K7;CXCL3	Up
Homologous recombination	1941-03-01	0.0188361	0.634147	0	0	5.30223	21.0604	BARD1;RAD51;POLD1	Up
Thyroid hormone signaling pathway	5/115	0.0217043	0.657641	0	0	3.1506	12.0676	GSK3B;KAT2A;DIO2;ATP1B1;ESR1	Up
Oocyte meiosis	5/116	0.0224352	0.617987	0	0	3.12344	11.8601	CCNE2;CCNE1;PLK1;FBXO5;CALM2	Up
Neurotrophin signaling pathway	5/121	0.0263282	0.664786	0	0	2.99437	10.8909	NGFR;GSK3B;NTRK3;MAP2K7;CALM2	Up
FoxO signaling pathway	5/132	0.0363401	0.847003	0	0	2.74484	9.09869	CDKN2D;IL6;PLK1;SKP2;SIRT1	Up
Mismatch repair	2022-02-01	0.0365567	0.791192	0	0	6.58762	21.7977	EXO1;POLD1	Up
Proximal tubule bicarbonate reclamation	2022-02-01	0.0365567	0.738446	0	0	6.58762	21.7977	ATP1B1;AQP1	Up
Endocrine and other factor-regulated calcium reabsorption	1955-03-01	0.0403147	0.763459	0	0	3.95257	12.6919	VDR;ATP1B1;ESR1	Up
Purine metabolism	5/136	0.0404888	0.721654	0	0	2.66411	8.54308	ENTPD4B;PDE3B;PDE4B;DCK;HDDC3	Up
Prostate cancer	1997-04-01	0.0454132	0.764456	0	0	2.9882	9.23936	GSK3B;CCNE2;CCNE1;ETV5	Up
Pyrimidine metabolism	1958-03-01	0.0460266	0.734003	0	0	3.74813	11.5387	ENTPD4B;TYMS;DCK	Up
Melanogenesis	4/100	0.0498085	0.754598	0	0	2.89855	8.69441	GSK3B;FZD3;FZD4;CALM2	Up
Aldosterone synthesis and secretion	4/102	0.0528642	0.762754	0	0	2.84172	8.35473	NR4A2;NR4A1;ATP1B1;CALM2	Up
Basal cell carcinoma	1963-03-01	0.0563801	0.776507	0	0	3.45066	9.92284	GSK3B;FZD3;FZD4	Up
Parathyroid hormone synthesis, secretion and action	4/107	0.0609394	0.80281	0	0	2.70893	7.57924	NR4A2;VDR;PDE4B;TNFSF11	Up
mTOR signaling pathway	5/154	0.0625983	0.790304	0	0	2.35272	6.51943	GSK3B;FZD3;FZD4;SKP2;WDR24	Up
Proteoglycans in cancer	6/203	0.0629232	0.762629	0	0	2.14179	5.92384	FZD3;FZD4;SDC1;EZR;FGF2;ESR1	Up
Neomycin, kanamycin and gentamicin biosynthesis	2022-05-01	0.067128	0.782299	0	0	14.4928	39.1472	HK2	Up
Wnt signaling pathway	5/160	0.0712232	0.799283	0	0	2.26449	5.98265	GSK3B;SFRP1;FZD3;FZD4;BAMBI	Up
Hepatitis B	5/163	0.0757686	0.819925	0	0	2.22281	5.73502	MAP2K3;IL6;CCNE2;CCNE1;MAP2K7	Up
Bile secretion	1972-03-01	0.0775081	0.809826	0	0	3.01932	7.72154	NCEH1;ATP1B1;AQP1	Up
Prolactin signaling pathway	1972-03-01	0.0775081	0.782832	0	0	3.01932	7.72154	GSK3B;TNFSF11;ESR1	Up
Kaposi sarcoma-associated herpesvirus infection	6/216	0.0795044	0.777092	0	0	2.01288	5.0965	GSK3B;IL6;MAP2K7;CXCL3;CALM2;FGF2	Up
Gastric acid secretion	1974-03-01	0.082613	0.782242	0	0	2.93772	7.32547	ATP1B1;EZR;CALM2	Up
Influenza A	5/168	0.0836854	0.768384	0	0	2.15666	5.35001	MAP2K3;GSK3B;IL6;KPNA2;MAP2K7	Up
Base excision repair	1935-02-01	0.0838713	0.747441	0	0	4.14079	10.2628	POLD1;UNG	Up
Renin secretion	1976-03-01	0.0878587	0.760605	0	0	2.86041	6.95659	PDE3B;CALM2;AQP1	Up
Hepatocellular carcinoma	5/171	0.0886375	0.746033	0	0	2.11882	5.13433	GSK3B;FZD3;PBRM1;FZD4;DPF1	Up
Lysosome	4/124	0.092906	0.760825	0	0	2.33754	5.55439	ENTPD4B;GGA1;PSAP;PPT2	Up
Alzheimer disease	5/175	0.0954725	0.761268	0	0	2.07039	4.86318	GSK3B;APOE;CYC1;ATP5G2;CALM2	Up
Epstein-Barr virus infection	6/229	0.0983088	0.763784	0	0	1.89861	4.4041	MAP2K3;IL6;CCNE2;CCNE1;SKP2;MAP2K7	Up
Ferroptosis	1940-02-01	0.105214	0.796994	0	0	3.62319	8.15855	MAP1LC3A;GPX4	Up
RNA degradation	1983-03-01	0.107269	0.792744	0	0	2.61917	5.84708	ENO1;EXOSC2;LSM4	Up
Rheumatoid arthritis	1984-03-01	0.110168	0.794785	0	0	2.58799	5.70845	IL11;IL6;TNFSF11	Up
Carbohydrate digestion and absorption	1943-02-01	0.118646	0.836039	0	0	3.37041	7.18441	ATP1B1;HK2	Up
Mineral absorption	1944-02-01	0.123214	0.848497	0	0	3.29381	6.89668	VDR;ATP1B1	Up
Pathways in cancer	11/535	0.12347	0.831367	0	0	1.48991	3.11652	GSK3B;FZD3;IL6;RAD51;CCNE2;FZD4;CCNE1;SKP2;CALM2;FGF2;ESR1	Up
Insulin signaling pathway	4/139	0.126459	0.83298	0	0	2.08529	4.31204	GSK3B;PDE3B;CALM2;HK2	Up
GnRH signaling pathway	1990-03-01	0.128175	0.826321	0	0	2.41546	4.96222	MAP2K3;MAP2K7;CALM2	Up
IL-17 signaling pathway	1991-03-01	0.131273	0.828661	0	0	2.38892	4.85063	GSK3B;IL6;CXCL3	Up
TGF-beta signaling pathway	1991-03-01	0.131273	0.81175	0	0	2.38892	4.85063	RBL1;BAMBI;ID3	Up
Morphine addiction	1992-03-01	0.134397	0.814447	0	0	2.36295	4.74233	PDE3B;GRK6;PDE4B	Up
Small cell lung cancer	1992-03-01	0.134397	0.798477	0	0	2.36295	4.74233	CCNE2;CCNE1;SKP2	Up
Measles	4/144	0.138638	0.807833	0	0	2.01288	3.97723	GSK3B;IL6;CCNE2;CCNE1	Up
Synthesis and degradation of ketone bodies	2022-11-01	0.14178	0.810556	0	0	6.58762	12.8687	HMGCLL1	Up
Cholesterol metabolism	1949-02-01	0.146647	0.822855	0	0	2.9577	5.67798	NCEH1;APOE	Up
Malaria	1949-02-01	0.146647	0.807894	0	0	2.9577	5.67798	IL6;SDC1	Up
Notch signaling pathway	1949-02-01	0.146647	0.793467	0	0	2.9577	5.67798	KAT2A;DTX2	Up
Glycerophospholipid metabolism	1997-03-01	0.150391	0.799447	0	0	2.24115	4.24589	GPD2;MBOAT7;DGKZ	Up
Toll-like receptor signaling pathway	1999-03-01	0.156953	0.819942	0	0	2.19587	4.06634	MAP2K3;IL6;MAP2K7	Up
Glucagon signaling pathway	3/102	0.166957	0.857423	0	0	2.13129	3.81504	PDE3B;CALM2;SIRT1	Up
cAMP signaling pathway	5/211	0.167945	0.848121	0	0	1.71715	3.0636	PDE3B;PDE4B;SOX9;ATP1B1;CALM2	Up
HIF-1 signaling pathway	3/104	0.173728	0.862945	0	0	2.0903	3.65858	IL6;ENO1;HK2	Up
Hippo signaling pathway	4/159	0.177756	0.86871	0	0	1.82299	3.14893	GSK3B;FZD3;FZD4;WWC1	Up
Legionellosis	1958-02-01	0.190731	0.917326	0	0	2.49875	4.14016	IL6;CXCL3	Up
MicroRNAs in cancer	6/281	0.193663	0.916872	0	0	1.54727	2.54005	FZD3;CCNE2;CCNE1;EZR;SIRT1;EZH2	Up
Lysine degradation	1959-02-01	0.195739	0.912444	0	0	2.4564	4.00632	ASH1L;EZH2	Up
C-type lectin receptor signaling pathway	3/112	0.201534	0.925223	0	0	1.94099	3.10908	IL6;KSR1;CALM2	Up
Glycerolipid metabolism	1961-02-01	0.205802	0.930715	0	0	2.37586	3.75586	DGAT2;DGKZ	Up
Viral carcinogenesis	5/229	0.210425	0.93763	0	0	1.58218	2.46602	KAT2A;RBL1;CCNE2;CCNE1;SKP2	Up
Nitrogen metabolism	2017-01-01	0.210479	0.924276	0	0	4.26257	6.64267	CAR12	Up
cGMP-PKG signaling pathway	4/172	0.214287	0.927558	0	0	1.6852	2.59595	RGS2;PDE3B;ATP1B1;CALM2	Up
Cytokine-cytokine receptor interaction	6/292	0.217294	0.927324	0	0	1.48898	2.27294	NGFR;IL11;IL6;LIF;TNFSF11;CXCL3	Up
Central carbon metabolism in cancer	1964-02-01	0.220994	0.930018	0	0	2.26449	3.41852	NTRK3;HK2	Up
PI3K-Akt signaling pathway	7/357	0.224659	0.932487	0	0	1.42086	2.12159	NGFR;NR4A1;GSK3B;IL6;CCNE2;CCNE1;FGF2	Up
Human papillomavirus infection	7/360	0.230709	0.944658	0	0	1.40902	2.06646	GSK3B;FZD3;RBL1;CCNE2;FZD4;CCNE1;TUBG1	Up
Tuberculosis	4/178	0.231805	0.936493	0	0	1.6284	2.38049	IL6;KSR1;VDR;CALM2	Up
One carbon pool by folate	2019-01-01	0.232138	0.925497	0	0	3.81388	5.56988	TYMS	Up
Glycolysis / Gluconeogenesis	1967-02-01	0.236275	0.929757	0	0	2.1631	3.12083	ENO1;HK2	Up
Amphetamine addiction	1968-02-01	0.241382	0.937676	0	0	2.13129	3.02936	SIRT1;CALM2	Up
Fc epsilon RI signaling pathway	1968-02-01	0.241382	0.925807	0	0	2.13129	3.02936	MAP2K3;MAP2K7	Up
RIG-I-like receptor signaling pathway	1968-02-01	0.241382	0.914234	0	0	2.13129	3.02936	RNF125;PIN1	Up
Cortisol synthesis and secretion	1969-02-01	0.246494	0.922071	0	0	2.1004	2.94143	NR4A1;NCEH1	Up
p53 signaling pathway	1971-02-01	0.256729	0.948646	0	0	2.04123	2.77553	CCNE2;CCNE1	Up
Thyroid hormone synthesis	1973-02-01	0.266971	0.974605	0	0	1.98531	2.62183	TTF2;ATP1B1	Up
Pertussis	1976-02-01	0.28233	1	0	0	1.90694	2.41167	IL6;CALM2	Up
Histidine metabolism	2024-01-01	0.283731	1	0	0	3.01932	3.80353	CARNMT1	Up
Synaptic vesicle cycle	1977-02-01	0.287444	1	0	0	1.88218	2.34656	RAB3A;SLC1A3	Up
Cardiac muscle contraction	1978-02-01	0.292555	1	0	0	1.85805	2.28373	CYC1;ATP1B1	Up
Salivary secretion	1978-02-01	0.292555	1	0	0	1.85805	2.28373	ATP1B1;CALM2	Up
Salmonella infection	1978-02-01	0.292555	0.996001	0	0	1.85805	2.28373	IL6;CXCL3	Up
Butanoate metabolism	2027-01-01	0.313013	1	0	0	2.68384	3.11731	HMGCLL1	Up
Phototransduction	2027-01-01	0.313013	1	0	0	2.68384	3.11731	CALM2	Up
Fluid shear stress and atherosclerosis	3/143	0.316028	1	0	0	1.52022	1.75118	SDC1;MAP2K7;CALM2	Up
ErbB signaling pathway	1984-02-01	0.323089	1	0	0	1.72533	1.94933	GSK3B;MAP2K7	Up
Rap1 signaling pathway	4/209	0.326503	1	0	0	1.38687	1.55234	MAP2K3;NGFR;CALM2;FGF2	Up
Fatty acid elongation	2029-01-01	0.331869	1	0	0	2.49875	2.75616	PPT2	Up
Hypertrophic cardiomyopathy (HCM)	1986-02-01	0.333198	1	0	0	1.6852	1.85207	IL6;EMD	Up
Insulin secretion	1986-02-01	0.333198	1	0	0	1.6852	1.85207	RAB3A;ATP1B1	Up
Non-alcoholic fatty liver disease (NAFLD)	3/151	0.346217	1	0	0	1.43968	1.52705	GSK3B;IL6;CYC1	Up
Progesterone-mediated oocyte maturation	1990-02-01	0.353282	1	0	0	1.61031	1.6755	PDE3B;PLK1	Up
Galactose metabolism	1932-01-01	0.35919	1	0	0	2.26449	2.31862	HK2	Up
Starch and sucrose metabolism	1933-01-01	0.368047	1	0	0	2.19587	2.19487	HK2	Up
Hematopoietic cell lineage	1994-02-01	0.373152	1	0	0	1.54178	1.51984	IL11;IL6	Up
Prion diseases	1934-01-01	0.376782	1	0	0	2.13129	2.08032	IL6	Up
MAPK signaling pathway	5/294	0.38247	1	0	0	1.23238	1.18444	MAP2K3;NGFR;NR4A1;MAP2K7;FGF2	Up
mRNA surveillance pathway	1996-02-01	0.382995	1	0	0	1.50966	1.44887	UPF2;DAZAP1	Up
Fructose and mannose metabolism	1935-01-01	0.385397	1	0	0	2.07039	1.97408	HK2	Up
Phosphatidylinositol signaling system	1998-02-01	0.392772	1	0	0	1.47885	1.38203	DGKZ;CALM2	Up
Nicotinate and nicotinamide metabolism	1936-01-01	0.393894	1	0	0	2.01288	1.87535	NADK2	Up
Primary immunodeficiency	1936-01-01	0.393894	1	0	0	2.01288	1.87535	UNG	Up
JAK-STAT signaling pathway	3/164	0.394939	1	0	0	1.32556	1.23148	IL11;IL6;LIF	Up
Thermogenesis	4/231	0.395276	1	0	0	1.25478	1.16466	MAP2K3;DPF1;CYC1;ATP5G2	Up
Ras signaling pathway	4/233	0.401499	1	0	0	1.24401	1.13522	NGFR;KSR1;CALM2;FGF2	Up
RNA transport	3/167	0.406064	1	0	0	1.30174	1.17319	UPF2;ELAC1;EIF4G1	Up
Tight junction	3/167	0.406064	1	0	0	1.30174	1.17319	AMOTL1;EZR;MAP2K7	Up
T cell receptor signaling pathway	2/101	0.407304	1	0	0	1.43493	1.28884	GSK3B;MAP2K7	Up
Aldosterone-regulated sodium reabsorption	1938-01-01	0.410537	1	0	0	1.90694	1.69773	ATP1B1	Up
Ribosome	3/170	0.417128	1	0	0	1.27877	1.11811	RPS16;MRPS10;MRPL23	Up
African trypanosomiasis	1939-01-01	0.418687	1	0	0	1.85805	1.61767	IL6	Up
Fat digestion and absorption	1940-01-01	0.426725	1	0	0	1.81159	1.54278	DGAT2	Up
Human T-cell leukemia virus 1 infection	4/245	0.438561	1	0	0	1.18308	0.975164	KAT2A;IL6;CCNE2;CCNE1	Up
Toxoplasmosis	2/108	0.440536	1	0	0	1.34192	1.10006	MAP2K3;IRGM1	Up
Insulin resistance	2/110	0.449843	1	0	0	1.31752	1.05251	GSK3B;IL6	Up
Intestinal immune network for IgA production	1943-01-01	0.45018	1	0	0	1.6852	1.34497	IL6	Up
Nucleotide excision repair	1943-01-01	0.45018	1	0	0	1.6852	1.34497	POLD1	Up
Vasopressin-regulated water reabsorption	1943-01-01	0.45018	1	0	0	1.6852	1.34497	AQP2	Up
Axon guidance	3/180	0.45349	1	0	0	1.20773	0.95505	EPHA4;GSK3B;FZD3	Up
Hedgehog signaling pathway	1944-01-01	0.457784	1	0	0	1.6469	1.28682	GSK3B	Up
Transcriptional misregulation in cancer	3/183	0.46422	1	0	0	1.18793	0.911614	NGFR;IL6;ETV5	Up
Ribosome biogenesis in eukaryotes	2/115	0.472723	1	0	0	1.26024	0.944229	TBL3;MDN1	Up
Sphingolipid metabolism	1948-01-01	0.487166	1	0	0	1.50966	1.08568	CERS1	Up
Type II diabetes mellitus	1948-01-01	0.487166	1	0	0	1.50966	1.08568	HK2	Up
Amino sugar and nucleotide sugar metabolism	1949-01-01	0.49426	1	0	0	1.47885	1.04214	HK2	Up
Arginine and proline metabolism	1950-01-01	0.501256	1	0	0	1.44928	1.00093	CKB	Up
N-Glycan biosynthesis	1950-01-01	0.501256	1	0	0	1.44928	1.00093	MGAT4B	Up
Fanconi anemia pathway	1951-01-01	0.508156	1	0	0	1.42086	0.961874	RAD51	Up
Chemokine signaling pathway	3/197	0.512994	1	0	0	1.10351	0.736583	GSK3B;GRK6;CXCL3	Up
Amyotrophic lateral sclerosis (ALS)	1952-01-01	0.514961	1	0	0	1.39353	0.924839	MAP2K3	Up
Inflammatory mediator regulation of TRP channels	2/127	0.52522	1	0	0	1.14116	0.734838	MAP2K3;CALM2	Up
Osteoclast differentiation	2/128	0.529434	1	0	0	1.13225	0.720049	TNFSF11;MAP2K7	Up
NOD-like receptor signaling pathway	3/205	0.539791	1	0	0	1.06045	0.653841	IL6;IFI204;CXCL3	Up
Regulation of lipolysis in adipocytes	1956-01-01	0.541255	1	0	0	1.294	0.79434	PDE3B	Up
Valine, leucine and isoleucine degradation	1956-01-01	0.541255	1	0	0	1.294	0.79434	HMGCLL1	Up
Spliceosome	2/132	0.546034	1	0	0	1.09794	0.664332	SF3A2;LSM4	Up
Endometrial cancer	1958-01-01	0.553864	1	0	0	1.24938	0.738176	GSK3B	Up
Estrogen signaling pathway	2/134	0.554181	1	0	0	1.08155	0.6384	ESR1;CALM2	Up
Oxidative phosphorylation	2/134	0.554181	1	0	0	1.08155	0.6384	CYC1;ATP5G2	Up
Dopaminergic synapse	2/135	0.558215	1	0	0	1.07354	0.625884	GSK3B;CALM2	Up
Inflammatory bowel disease (IBD)	1959-01-01	0.560038	1	0	0	1.2282	0.712048	IL6	Up
Apelin signaling pathway	2/138	0.570162	1	0	0	1.0502	0.590039	PDE3B;CALM2	Up
Cytosolic DNA-sensing pathway	1961-01-01	0.572133	1	0	0	1.18793	0.663321	IL6	Up
Apoptosis	2/141	0.581874	1	0	0	1.02785	0.556585	NGFR;LMNB2	Up
Glutathione metabolism	1964-01-01	0.589657	1	0	0	1.13225	0.598068	GPX4	Up
Graft-versus-host disease	1964-01-01	0.589657	1	0	0	1.13225	0.598068	IL6	Up
Parkinson disease	2/144	0.593351	1	0	0	1.00644	0.525332	CYC1;ATP5G2	Up
Aminoacyl-tRNA biosynthesis	1966-01-01	0.600941	1	0	0	1.09794	0.559134	VARS	Up
Long-term potentiation	1967-01-01	0.606466	1	0	0	1.08155	0.54089	CALM2	Up
Adrenergic signaling in cardiomyocytes	2/148	0.608285	1	0	0	0.97924	0.486791	ATP1B1;CALM2	Up
Oxytocin signaling pathway	2/154	0.629902	1	0	0	0.941088	0.434962	RGS2;CALM2	Up
Arrhythmogenic right ventricular cardiomyopathy (ARVC)	1972-01-01	0.632969	1	0	0	1.00644	0.460279	EMD	Up
B cell receptor signaling pathway	1972-01-01	0.632969	1	0	0	1.00644	0.460279	GSK3B	Up
Melanoma	1972-01-01	0.632969	1	0	0	1.00644	0.460279	FGF2	Up
Human immunodeficiency virus 1 infection	3/238	0.64078	1	0	0	0.913409	0.40653	MAP2K3;MAP2K7;CALM2	Up
Glioma	1975-01-01	0.64801	1	0	0	0.966184	0.419178	CALM2	Up
Pancreatic cancer	1975-01-01	0.64801	1	0	0	0.966184	0.419178	RAD51	Up
Protein processing in endoplasmic reticulum	2/163	0.660574	1	0	0	0.889126	0.368673	HSPH1;MAP2K7	Up
ECM-receptor interaction	1983-01-01	0.685182	1	0	0	0.873057	0.330077	SDC1	Up
Human cytomegalovirus infection	3/255	0.686368	1	0	0	0.852515	0.320837	GSK3B;IL6;CALM2	Up
Peroxisome	1984-01-01	0.689545	1	0	0	0.862664	0.320673	HMGCLL1	Up
Viral myocarditis	1987-01-01	0.702274	1	0	0	0.832917	0.294379	EIF4G1	Up
Colorectal cancer	1988-01-01	0.706401	1	0	0	0.823452	0.286209	GSK3B	Up
Dilated cardiomyopathy (DCM)	1990-01-01	0.714484	1	0	0	0.805153	0.270688	EMD	Up
Protein digestion and absorption	1990-01-01	0.714484	1	0	0	0.805153	0.270688	ATP1B1	Up
Huntington disease	2/192	0.745673	1	0	0	0.754831	0.221519	CYC1;ATP5G2	Up
Choline metabolism in cancer	1999-01-01	0.748199	1	0	0	0.731957	0.212331	DGKZ	Up
Circadian entrainment	1999-01-01	0.748199	1	0	0	0.731957	0.212331	CALM2	Up
AGE-RAGE signaling pathway in diabetic complications	1/101	0.755135	1	0	0	0.717463	0.201506	IL6	Up
Longevity regulating pathway	1/102	0.758531	1	0	0	0.710429	0.196342	SIRT1	Up
NF-kappa B signaling pathway	1/102	0.758531	1	0	0	0.710429	0.196342	TNFSF11	Up
Th17 cell differentiation	1/102	0.758531	1	0	0	0.710429	0.196342	IL6	Up
Chagas disease (American trypanosomiasis)	1/103	0.76188	1	0	0	0.703532	0.191336	IL6	Up
Alcoholism	2/199	0.763265	1	0	0	0.728279	0.196744	H2AFX;CALM2	Up
Pancreatic secretion	1/105	0.768441	1	0	0	0.690131	0.181775	ATP1B1	Up
Amoebiasis	1/106	0.771653	1	0	0	0.68362	0.177208	IL6	Up
Glutamatergic synapse	1/114	0.795804	1	0	0	0.635647	0.145183	SLC1A3	Up
Leukocyte transendothelial migration	1/115	0.798638	1	0	0	0.63012	0.141681	EZR	Up
Regulation of actin cytoskeleton	2/217	0.803735	1	0	0	0.667869	0.14592	EZR;FGF2	Up
Sphingolipid signaling pathway	1/124	0.822444	1	0	0	0.584385	0.114233	CERS1	Up
AMPK signaling pathway	1/126	0.827341	1	0	0	0.575109	0.109005	SIRT1	Up
Relaxin signaling pathway	1/131	0.839002	1	0	0	0.553159	0.0971024	MAP2K7	Up
Ubiquitin mediated proteolysis	1/138	0.854022	1	0	0	0.5251	0.08286	SKP2	Up
Vascular smooth muscle contraction	1/140	0.858051	1	0	0	0.517598	0.0792402	CALM2	Up
Systemic lupus erythematosus	1/143	0.863887	1	0	0	0.50674	0.0741426	H2AFX	Up
Phospholipase D signaling pathway	1/149	0.874852	1	0	0	0.486334	0.0650229	DGKZ	Up
Endocytosis	2/269	0.888256	1	0	0	0.538764	0.0638411	GRK6;VPS37B	Up
Hepatitis C	1/160	0.89272	1	0	0	0.452899	0.0513961	GSK3B	Up
Cell adhesion molecules (CAMs)	1/170	0.906746	1	0	0	0.426257	0.0417275	SDC1	Up
Necroptosis	1/176	0.914269	1	0	0	0.411726	0.0369034	H2AFX	Up
Calcium signaling pathway	1/189	0.928557	1	0	0	0.383406	0.0284195	CALM2	Up
Focal adhesion	1/199	0.93791	1	0	0	0.36414	0.0233417	GSK3B	Up
Herpes simplex virus 1 infection	2/433	0.983591	1	0	0	0.334706	0.00553779	IL6;ZFP266	Up
Olfactory transduction	2/1133	0.999995	1	0	0	0.127915	7.00187e-07	RGS2;CALM2	Up

## Sheet: Down_TgC_vs_TNFtg-KEGG_2019_Mou
Term	Overlap	P-value	Adjusted P-value	Old P-value	Old Adjusted P-value	Odds Ratio	Combined Score	Genes	Type
Phagosome	8/180	0.011499	1	0	0	2.63765	11.7784	MRC2;MSR1;DYNC1H1;H2-K1;H2-M3;PIK3C3;TLR6;THBS4	Down
ECM-receptor interaction	1983-05-01	0.0131318	1	0	0	3.57513	15.49	LAMA5;COL2A1;IBSP;TNN;THBS4	Down
PI3K-Akt signaling pathway	12/357	0.0185053	1	0	0	1.99486	7.9589	LAMA5;ANGPT4;CDKN1B;COL2A1;IBSP;TNN;FLT4;LPAR1;IGF2;VEGFB;THBS4;ATF4	Down
Focal adhesion	8/199	0.0198878	1	0	0	2.38582	9.34679	LAMA5;COL2A1;IBSP;TNN;FLT4;VEGFB;THBS4;MYL12B	Down
MAPK signaling pathway	10/294	0.0279783	1	0	0	2.01861	7.21922	HSPA8;CACNG7;ANGPT4;MEF2C;GADD45A;FLT4;IGF2;VEGFB;ECSIT;ATF4	Down
AGE-RAGE signaling pathway in diabetic complications	5/101	0.0281311	1	0	0	2.93798	10.4912	CDKN1B;VEGFB;PLCE1;NOX4;AGTR1A	Down
Apoptosis	6/141	0.0324034	1	0	0	2.52541	8.66088	CASP12;PARP4;GADD45A;CTSH;CTSC;ATF4	Down
Nucleotide excision repair	1943-03-01	0.0356409	1	0	0	4.1405	13.8055	XPA;ERCC5;GTF2H3	Down
Steroid biosynthesis	2019-02-01	0.0400808	1	0	0	6.24707	20.0959	EBP;CYP51	Down
Viral carcinogenesis	8/229	0.0407951	1	0	0	2.07326	6.63277	EGR2;CDKN2B;CDKN1B;CDKN2A;H2-K1;H2-M3;GTF2H3;ATF4	Down
Human papillomavirus infection	11/360	0.042461	1	0	0	1.81339	5.7288	WNT10B;LAMA5;CDKN1B;COL2A1;IBSP;DLG3;TNN;IRF1;H2-K1;H2-M3;THBS4	Down
Thyroid hormone signaling pathway	5/115	0.0452325	1	0	0	2.58031	7.98849	BMP4;RCAN2;PLCE1;DIO3;SLC16A2	Down
Arginine and proline metabolism	1950-03-01	0.0519944	1	0	0	3.56083	10.528	ALDH4A1;ALDH2;AZIN2	Down
Cushing syndrome	6/159	0.0527913	1	0	0	2.23952	6.58733	WNT10B;CDKN2B;CDKN1B;CDKN2A;AGTR1A;ATF4	Down
Terpenoid backbone biosynthesis	2023-02-01	0.0567625	1	0	0	5.16062	14.8052	GGPS1;PDSS2	Down
Cell cycle	5/123	0.0572781	1	0	0	2.41249	6.89932	CDKN2B;CDKN1B;GADD45A;CDKN2A;SFN	Down
Small cell lung cancer	1992-04-01	0.0700302	1	0	0	2.58031	6.86061	LAMA5;CDKN2B;CDKN1B;GADD45A	Down
FoxO signaling pathway	5/132	0.0728231	1	0	0	2.248	5.88913	CDKN2B;CDKN1B;GADD45A;SETD7;PRKAG2	Down
Lysine degradation	1959-03-01	0.0773803	1	0	0	3.01765	7.72225	ALDH2;SETD7;PRDM2	Down
Transcriptional misregulation in cancer	6/183	0.0898979	1	0	0	1.94581	4.68761	MEF2C;CDKN1B;HPGD;GADD45A;NUPR1;GRIA3	Down
Basal cell carcinoma	1963-03-01	0.0901053	1	0	0	2.82606	6.80168	BMP4;WNT10B;GADD45A	Down
Circadian rhythm	1930-02-01	0.0904591	1	0	0	3.95648	9.50685	PRKAG2;BTRC	Down
Cellular senescence	6/185	0.0935013	1	0	0	1.92477	4.56129	CDKN2B;GADD45A;CDKN2A;H2-K1;H2-M3;BTRC	Down
Parathyroid hormone synthesis, secretion and action	4/107	0.107013	1	0	0	2.21859	4.95812	MEF2C;MMP13;PTH1R;ATF4	Down
Type I diabetes mellitus	1969-03-01	0.110688	1	0	0	2.58031	5.67938	PTPRN;H2-K1;H2-M3	Down
p53 signaling pathway	1971-03-01	0.117916	1	0	0	2.50763	5.36076	CDKN2A;GADD45A;SFN	Down
Cytokine-cytokine receptor interaction	8/292	0.121821	1	0	0	1.62595	3.42296	BMP4;GDF11;CCL8;CCL20;TNFSF12;LIFR;IL11RA1;CXCL16	Down
Nicotinate and nicotinamide metabolism	1936-02-01	0.122833	1	0	0	3.29707	6.91371	NNMT;NMNAT2	Down
Renin-angiotensin system	1936-02-01	0.122833	1	0	0	3.29707	6.91371	ANPEP;AGTR1A	Down
Riboflavin metabolism	2022-08-01	0.127133	1	0	0	7.4184	15.3006	FLAD1	Down
Alanine, aspartate and glutamate metabolism	1937-02-01	0.128473	1	0	0	3.20796	6.58285	ALDH4A1;ALDH5A1	Down
Ribosome biogenesis in eukaryotes	4/115	0.129691	1	0	0	2.06425	4.21644	POP4;EFL1;DROSHA;GNL2	Down
Chronic myeloid leukemia	1976-03-01	0.136717	1	0	0	2.34265	4.66151	CDKN1B;CDKN2A;GADD45A	Down
Protein processing in endoplasmic reticulum	5/163	0.141674	1	0	0	1.82047	3.5576	HSPA8;CASP12;FBXO2;MAN1C1;ATF4	Down
Tight junction	5/167	0.152121	1	0	0	1.77686	3.34597	DLG3;PRKAG2;ARHGAP17;ACTR3B;MYL12B	Down
Lysosome	4/124	0.157346	1	0	0	1.91443	3.54036	NAGLU;CTSH;CD68;CTSC	Down
Ribosome	5/170	0.160162	1	0	0	1.74551	3.19701	RPL4;RPL5;RPS15A;RPS8;RPS24	Down
cGMP-PKG signaling pathway	5/172	0.165617	1	0	0	1.72521	3.10206	MEF2C;NPR2;ADRA2A;AGTR1A;ATF4	Down
Taurine and hypotaurine metabolism	2022-11-01	0.170536	1	0	0	5.3952	9.54306	CDO1	Down
Axon guidance	5/180	0.188145	1	0	0	1.64853	2.75394	CFL1;SEMA3B;SRGAP1;SSH3;MYL12B	Down
Antigen processing and presentation	1990-03-01	0.19397	1	0	0	1.97824	3.24442	HSPA8;H2-K1;H2-M3	Down
Protein digestion and absorption	1990-03-01	0.19397	1	0	0	1.97824	3.24442	COL2A1;COL14A1;COL10A1	Down
Pathways in cancer	12/535	0.194107	1	0	0	1.33115	2.18222	BMP4;WNT10B;LAMA5;CDKN2B;CDKN1B;GADD45A;CDKN2A;FLT4;LPAR1;IGF2;VEGFB;AGTR1A	Down
Ras signaling pathway	6/233	0.201024	1	0	0	1.52825	2.45182	ANGPT4;RASA3;FLT4;IGF2;VEGFB;PLCE1	Down
Apelin signaling pathway	4/138	0.204136	1	0	0	1.72021	2.73336	MEF2C;PRKAG2;PIK3C3;AGTR1A	Down
Phosphatidylinositol signaling system	1998-03-01	0.228956	1	0	0	1.81675	2.6783	DGKA;PLCE1;PIK3C3	Down
Human T-cell leukemia virus 1 infection	6/245	0.233128	1	0	0	1.4534	2.11639	EGR2;CDKN2B;CDKN2A;H2-K1;H2-M3;ATF4	Down
Adrenergic signaling in cardiomyocytes	4/148	0.239751	1	0	0	1.60398	2.29073	CACNG7;SCN7A;AGTR1A;ATF4	Down
Glucagon signaling pathway	3/102	0.246873	1	0	0	1.74551	2.44175	PRKAG2;PYGL;ATF4	Down
Longevity regulating pathway	3/102	0.246873	1	0	0	1.74551	2.44175	HSPA8;PRKAG2;ATF4	Down
Gastric cancer	4/150	0.247045	1	0	0	1.58259	2.21276	WNT10B;CDKN2B;CDKN1B;GADD45A	Down
Proteoglycans in cancer	5/203	0.258142	1	0	0	1.46175	1.97957	WNT10B;LUM;IGF2;PLCE1;DROSHA	Down
Oxytocin signaling pathway	4/154	0.261772	1	0	0	1.54149	2.06602	CACNG7;MEF2C;NPR2;PRKAG2	Down
Glycerolipid metabolism	1961-02-01	0.274569	1	0	0	1.94581	2.51506	ALDH2;DGKA	Down
One carbon pool by folate	2019-01-01	0.276043	1	0	0	3.12354	4.02061	MTFMT	Down
Rap1 signaling pathway	5/209	0.277371	1	0	0	1.41979	1.82074	ANGPT4;FLT4;LPAR1;VEGFB;PLCE1	Down
Hippo signaling pathway	4/159	0.280407	1	0	0	1.49301	1.89838	BMP4;WNT10B;DLG3;BTRC	Down
TNF signaling pathway	3/110	0.283277	1	0	0	1.61856	2.04154	CCL20;IRF1;ATF4	Down
Wnt signaling pathway	4/160	0.28416	1	0	0	1.48368	1.86679	WNT10B;WIF1;RSPO2;BTRC	Down
Allograft rejection	1963-02-01	0.28708	1	0	0	1.88404	2.35127	H2-K1;H2-M3	Down
Mitophagy	1963-02-01	0.28708	1	0	0	1.88404	2.35127	OPTN;ATF4	Down
Glutathione metabolism	1964-02-01	0.293327	1	0	0	1.8546	2.2746	GGCT;ANPEP	Down
Graft-versus-host disease	1964-02-01	0.293327	1	0	0	1.8546	2.2746	H2-K1;H2-M3	Down
Glycosaminoglycan degradation	2021-01-01	0.300259	1	0	0	2.82606	3.40006	NAGLU	Down
Regulation of actin cytoskeleton	5/217	0.303434	1	0	0	1.36745	1.6308	ARPC3;CFL1;LPAR1;SSH3;MYL12B	Down
Non-small cell lung cancer	1966-02-01	0.305798	1	0	0	1.7984	2.1308	CDKN2A;GADD45A	Down
Amphetamine addiction	1968-02-01	0.318226	1	0	0	1.74551	1.99859	GRIA3;ATF4	Down
Mannose type O-glycan biosynthesis	2023-01-01	0.323666	1	0	0	2.58031	2.9107	FKTN	Down
Cortisol synthesis and secretion	1969-02-01	0.324422	1	0	0	1.72021	1.93646	AGTR1A;ATF4	Down
Hepatocellular carcinoma	4/171	0.325841	1	0	0	1.38824	1.55669	WNT10B;GADD45A;CDKN2A;IGF2	Down
Histidine metabolism	2024-01-01	0.335075	1	0	0	2.4728	2.70376	ALDH2	Down
Adipocytokine signaling pathway	1971-02-01	0.336767	1	0	0	1.67175	1.81947	NPY;PRKAG2	Down
Melanoma	1972-02-01	0.342915	1	0	0	1.64853	1.76438	CDKN2A;GADD45A	Down
Inositol phosphate metabolism	1973-02-01	0.349044	1	0	0	1.62595	1.7114	PLCE1;PIK3C3	Down
Bacterial invasion of epithelial cells	1974-02-01	0.355155	1	0	0	1.60398	1.66044	ARPC3;CD2AP	Down
Glioma	1975-02-01	0.361244	1	0	0	1.58259	1.6114	CDKN2A;GADD45A	Down
Pancreatic cancer	1975-02-01	0.361244	1	0	0	1.58259	1.6114	CDKN2A;GADD45A	Down
Pertussis	1976-02-01	0.367313	1	0	0	1.56177	1.56418	IRF1;CFL1	Down
Ascorbate and aldarate metabolism	2027-01-01	0.368165	1	0	0	2.19804	2.19634	ALDH2	Down
Butanoate metabolism	2027-01-01	0.368165	1	0	0	2.19804	2.19634	ALDH5A1	Down
Neuroactive ligand-receptor interaction	7/348	0.371418	1	0	0	1.19377	1.18234	NPY;LPAR1;ADM;PTH1R;AGTR1A;GRIA3;ADRA2A	Down
Autophagy	3/130	0.37532	1	0	0	1.36955	1.34213	ATG4C;PIK3C3;ZFYVE1	Down
Mucin type O-glycan biosynthesis	2028-01-01	0.378826	1	0	0	2.11954	2.0574	GCNT4	Down
RNA polymerase	2028-01-01	0.378826	1	0	0	2.11954	2.0574	POLR3GL	Down
Autoimmune thyroid disease	1978-02-01	0.379381	1	0	0	1.52172	1.47488	H2-K1;H2-M3	Down
Salmonella infection	1978-02-01	0.379381	1	0	0	1.52172	1.47488	DYNC1H1;ARPC3	Down
Relaxin signaling pathway	3/131	0.379892	1	0	0	1.3591	1.31542	MMP13;VEGFB;ATF4	Down
Fatty acid elongation	2029-01-01	0.389307	1	0	0	2.04645	1.9306	HACD2	Down
Signaling pathways regulating pluripotency of stem cells	3/137	0.407159	1	0	0	1.29957	1.16773	BMP4;WNT10B;LIFR	Down
Ubiquitin mediated proteolysis	3/138	0.41167	1	0	0	1.29016	1.14506	HERC4;FBXO2;BTRC	Down
ErbB signaling pathway	1984-02-01	0.414974	1	0	0	1.41303	1.24282	CDKN1B;NRG1	Down
Biosynthesis of unsaturated fatty acids	1932-01-01	0.419705	1	0	0	1.8546	1.61017	HACD2	Down
beta-Alanine metabolism	1932-01-01	0.419705	1	0	0	1.8546	1.61017	ALDH2	Down
Vascular smooth muscle contraction	3/140	0.420661	1	0	0	1.27173	1.10122	NPR2;ADM;AGTR1A	Down
PPAR signaling pathway	1985-02-01	0.420808	1	0	0	1.3964	1.2087	FABP7;ANGPTL4	Down
Hypertrophic cardiomyopathy (HCM)	1986-02-01	0.426613	1	0	0	1.38017	1.17574	CACNG7;PRKAG2	Down
SNARE interactions in vesicular transport	1933-01-01	0.429499	1	0	0	1.7984	1.51989	VTI1A	Down
Starch and sucrose metabolism	1933-01-01	0.429499	1	0	0	1.7984	1.51989	PYGL	Down
Fc gamma R-mediated phagocytosis	1987-02-01	0.432387	1	0	0	1.3643	1.14388	ARPC3;CFL1	Down
Viral myocarditis	1987-02-01	0.432387	1	0	0	1.3643	1.14388	H2-K1;H2-M3	Down
Pentose and glucuronate interconversions	1934-01-01	0.439128	1	0	0	1.74551	1.43649	SORD	Down
Prion diseases	1934-01-01	0.439128	1	0	0	1.74551	1.43649	CASP12	Down
Arachidonic acid metabolism	1989-02-01	0.443841	1	0	0	1.33364	1.08331	CBR2;CYP2J6	Down
Herpes simplex virus 1 infection	8/433	0.446131	1	0	0	1.09648	0.885019	ZFP810;ZFP747;ZFP933;ZFP317;H2-K1;H2-M3;ZFP398;ZFP386	Down
Base excision repair	1935-01-01	0.448594	1	0	0	1.69563	1.35928	PARP4	Down
DNA replication	1935-01-01	0.448594	1	0	0	1.69563	1.35928	RNASEH2B	Down
Fructose and mannose metabolism	1935-01-01	0.448594	1	0	0	1.69563	1.35928	SORD	Down
Breast cancer	3/147	0.451744	1	0	0	1.21117	0.962442	WNT10B;GADD45A;FLT4	Down
IL-17 signaling pathway	1991-02-01	0.455166	1	0	0	1.30433	1.02663	MMP13;CCL20	Down
TGF-beta signaling pathway	1991-02-01	0.455166	1	0	0	1.30433	1.02663	BMP4;CDKN2B	Down
Phospholipase D signaling pathway	3/149	0.460501	1	0	0	1.19491	0.92658	DGKA;LPAR1;AGTR1A	Down
Thyroid cancer	1937-01-01	0.467053	1	0	0	1.60398	1.22113	GADD45A	Down
Non-alcoholic fatty liver disease (NAFLD)	3/151	0.469198	1	0	0	1.17908	0.892247	NDUFA5;PRKAG2;ATF4	Down
Hematopoietic cell lineage	1994-02-01	0.471902	1	0	0	1.26271	0.948272	ANPEP;IL11RA1	Down
Endocytosis	5/269	0.475602	1	0	0	1.10311	0.819801	HSPA8;ARPC3;GBF1;H2-K1;H2-M3	Down
Aldosterone-regulated sodium reabsorption	1938-01-01	0.476049	1	0	0	1.56177	1.1592	SFN	Down
Pyruvate metabolism	1938-01-01	0.476049	1	0	0	1.56177	1.1592	ALDH2	Down
cAMP signaling pathway	4/211	0.476887	1	0	0	1.12507	0.833084	NPY;FXYD1;PLCE1;GRIA3	Down
mTOR signaling pathway	3/154	0.482125	1	0	0	1.15611	0.843445	WNT10B;WDR59;LAMTOR2	Down
Prostate cancer	1997-02-01	0.488326	1	0	0	1.22365	0.87708	CDKN1B;ATF4	Down
Nicotine addiction	1940-01-01	0.493591	1	0	0	1.48368	1.04755	GRIA3	Down
Bladder cancer	1941-01-01	0.502141	1	0	0	1.44749	0.997139	CDKN2A	Down
Aldosterone synthesis and secretion	2/102	0.514979	1	0	0	1.16367	0.772246	AGTR1A;ATF4	Down
Basal transcription factors	1943-01-01	0.518812	1	0	0	1.38017	0.905684	GTF2H3	Down
Vasopressin-regulated water reabsorption	1943-01-01	0.518812	1	0	0	1.38017	0.905684	DYNC1H1	Down
Hepatitis B	3/163	0.519972	1	0	0	1.09228	0.714329	EGR2;CASP12;ATF4	Down
HIF-1 signaling pathway	2/104	0.525381	1	0	0	1.14129	0.734573	ANGPT4;CDKN1B	Down
Hedgehog signaling pathway	1944-01-01	0.526937	1	0	0	1.3488	0.86414	BTRC	Down
Glycosphingolipid biosynthesis	1945-01-01	0.534926	1	0	0	1.31883	0.825093	A4GALT	Down
Amoebiasis	2/106	0.535631	1	0	0	1.11976	0.699076	LAMA5;SERPINB1A	Down
Epstein-Barr virus infection	4/229	0.540901	1	0	0	1.03663	0.637031	CDKN1B;GADD45A;H2-K1;H2-M3	Down
Proteasome	1946-01-01	0.54278	1	0	0	1.29016	0.788351	PSMB10	Down
Toxoplasmosis	2/108	0.545729	1	0	0	1.09902	0.665604	HSPA8;LAMA5	Down
Insulin resistance	2/110	0.555673	1	0	0	1.07904	0.634017	PRKAG2;PYGL	Down
Cocaine addiction	1948-01-01	0.558094	1	0	0	1.2364	0.721103	ATF4	Down
Tryptophan metabolism	1948-01-01	0.558094	1	0	0	1.2364	0.721103	ALDH2	Down
C-type lectin receptor signaling pathway	2/112	0.565462	1	0	0	1.05977	0.604189	EGR2;IRF1	Down
Cholesterol metabolism	1949-01-01	0.565558	1	0	0	1.21117	0.690295	ANGPTL4	Down
Malaria	1949-01-01	0.565558	1	0	0	1.21117	0.690295	THBS4	Down
Human immunodeficiency virus 1 infection	4/238	0.571381	1	0	0	0.997432	0.558261	H2-K1;CFL1;H2-M3;BTRC	Down
Cysteine and methionine metabolism	1950-01-01	0.572896	1	0	0	1.18694	0.661188	CDO1	Down
Fatty acid degradation	1950-01-01	0.572896	1	0	0	1.18694	0.661188	ALDH2	Down
Linoleic acid metabolism	1950-01-01	0.572896	1	0	0	1.18694	0.661188	CYP2J6	Down
N-Glycan biosynthesis	1950-01-01	0.572896	1	0	0	1.18694	0.661188	MAN1C1	Down
Tuberculosis	3/178	0.579548	1	0	0	1.00023	0.545634	MRC2;PIK3C3;TLR6	Down
Fanconi anemia pathway	1951-01-01	0.580111	1	0	0	1.16367	0.63366	POLI	Down
Amyotrophic lateral sclerosis (ALS)	1952-01-01	0.587204	1	0	0	1.14129	0.607604	CASP12	Down
Endocrine and other factor-regulated calcium reabsorption	1955-01-01	0.607775	1	0	0	1.07904	0.537308	PTH1R	Down
Regulation of lipolysis in adipocytes	1956-01-01	0.614402	1	0	0	1.05977	0.51622	NPY	Down
Valine, leucine and isoleucine degradation	1956-01-01	0.614402	1	0	0	1.05977	0.51622	ALDH2	Down
Calcium signaling pathway	3/189	0.620169	1	0	0	0.942019	0.450062	PLCE1;AGTR1A;TPCN1	Down
Ovarian steroidogenesis	1957-01-01	0.620918	1	0	0	1.04118	0.496181	CYP2J6	Down
Human cytomegalovirus infection	4/255	0.625734	1	0	0	0.930936	0.43645	CDKN2A;H2-K1;H2-M3;ATF4	Down
Endometrial cancer	1958-01-01	0.627323	1	0	0	1.02323	0.477124	GADD45A	Down
Legionellosis	1958-01-01	0.627323	1	0	0	1.02323	0.477124	HSPA8	Down
Cytosolic DNA-sensing pathway	1961-01-01	0.6459	1	0	0	0.972905	0.425266	POLR3GL	Down
Long-term depression	1961-01-01	0.6459	1	0	0	0.972905	0.425266	GRIA3	Down
Chemokine signaling pathway	3/197	0.647992	1	0	0	0.903764	0.392122	CCL8;CCL20;CXCL16	Down
Spliceosome	2/132	0.654759	1	0	0	0.8992	0.380801	HSPA8;SART1	Down
Estrogen signaling pathway	2/134	0.662835	1	0	0	0.885779	0.364258	HSPA8;ATF4	Down
Dopaminergic synapse	2/135	0.666816	1	0	0	0.879217	0.356295	GRIA3;ATF4	Down
Purine metabolism	2/136	0.670759	1	0	0	0.872753	0.34853	NUDT9;NPR2	Down
Aminoacyl-tRNA biosynthesis	1966-01-01	0.674833	1	0	0	0.8992	0.353647	MTFMT	Down
Metabolism of xenobiotics by cytochrome P450	1966-01-01	0.674833	1	0	0	0.8992	0.353647	CBR2	Down
Glycolysis / Gluconeogenesis	1967-01-01	0.68033	1	0	0	0.885779	0.341182	ALDH2	Down
Long-term potentiation	1967-01-01	0.68033	1	0	0	0.885779	0.341182	ATF4	Down
Insulin signaling pathway	2/139	0.682361	1	0	0	0.853916	0.326363	PRKAG2;PYGL	Down
Fluid shear stress and atherosclerosis	2/143	0.69731	1	0	0	0.830031	0.299247	BMP4;MEF2C	Down
Measles	2/144	0.700955	1	0	0	0.824266	0.292871	HSPA8;CDKN1B	Down
Arrhythmogenic right ventricular cardiomyopathy (ARVC)	1972-01-01	0.706457	1	0	0	0.824266	0.286427	CACNG7	Down
Prolactin signaling pathway	1972-01-01	0.706457	1	0	0	0.824266	0.286427	IRF1	Down
Kaposi sarcoma-associated herpesvirus infection	3/216	0.708165	1	0	0	0.824266	0.284436	H2-K1;H2-M3;PIK3C3	Down
Thyroid hormone synthesis	1973-01-01	0.711421	1	0	0	0.812975	0.276811	ATF4	Down
Retrograde endocannabinoid signaling	2/150	0.722068	1	0	0	0.791296	0.257674	NDUFA5;GRIA3	Down
Renin secretion	1976-01-01	0.725816	1	0	0	0.780884	0.250241	AGTR1A	Down
Cardiac muscle contraction	1978-01-01	0.735013	1	0	0	0.760861	0.234244	CACNG7	Down
Salivary secretion	1978-01-01	0.735013	1	0	0	0.760861	0.234244	LYZ2	Down
Rheumatoid arthritis	1984-01-01	0.760799	1	0	0	0.706514	0.193151	CCL20	Down
JAK-STAT signaling pathway	2/164	0.766479	1	0	0	0.723746	0.192479	LIFR;IL11RA1	Down
Gap junction	1986-01-01	0.768826	1	0	0	0.690084	0.181417	LPAR1	Down
Insulin secretion	1986-01-01	0.768826	1	0	0	0.690084	0.181417	ATF4	Down
Colorectal cancer	1988-01-01	0.776584	1	0	0	0.6744	0.170522	GADD45A	Down
Complement and coagulation cascades	1988-01-01	0.776584	1	0	0	0.6744	0.170522	CFB	Down
Influenza A	2/168	0.777984	1	0	0	0.706514	0.17737	HSPA8;FURIN	Down
Cell adhesion molecules (CAMs)	2/170	0.783549	1	0	0	0.698202	0.170306	H2-K1;H2-M3	Down
Dilated cardiomyopathy (DCM)	1990-01-01	0.784083	1	0	0	0.659413	0.160396	CACNG7	Down
GnRH signaling pathway	1990-01-01	0.784083	1	0	0	0.659413	0.160396	ATF4	Down
Retinol metabolism	1991-01-01	0.787737	1	0	0	0.652167	0.155601	ALDH1A2	Down
Alzheimer disease	2/175	0.79693	1	0	0	0.678253	0.153956	CASP12;NDUFA5	Down
Necroptosis	2/176	0.799516	1	0	0	0.6744	0.150896	PARP4;PYGL	Down
Staphylococcus aureus infection	1995-01-01	0.801749	1	0	0	0.624707	0.138035	CFB	Down
Glycerophospholipid metabolism	1997-01-01	0.808405	1	0	0	0.611827	0.13013	DGKA	Down
Choline metabolism in cancer	1999-01-01	0.814839	1	0	0	0.599466	0.12275	DGKA	Down
Circadian entrainment	1999-01-01	0.814839	1	0	0	0.599466	0.12275	GRIA3	Down
Toll-like receptor signaling pathway	1999-01-01	0.814839	1	0	0	0.599466	0.12275	TLR6	Down
Melanogenesis	1/100	0.817974	1	0	0	0.593472	0.119243	WNT10B	Down
Chagas disease (American trypanosomiasis)	1/103	0.827067	1	0	0	0.576186	0.109401	TLR6	Down
Alcoholism	2/199	0.851453	1	0	0	0.596454	0.0959161	NPY;ATF4	Down
Cholinergic synapse	1/113	0.854228	1	0	0	0.525196	0.0827487	ATF4	Down
MicroRNAs in cancer	3/281	0.85533	1	0	0	0.6336	0.099011	CDKN1B;CDKN2A;TNN	Down
Glutamatergic synapse	1/114	0.856698	1	0	0	0.520589	0.0805196	GRIA3	Down
Leukocyte transendothelial migration	1/115	0.859126	1	0	0	0.516062	0.0783586	MYL12B	Down
Oocyte meiosis	1/116	0.861514	1	0	0	0.511614	0.0762634	BTRC	Down
NOD-like receptor signaling pathway	2/205	0.862829	1	0	0	0.578997	0.0854248	CASP12;CASP4	Down
Natural killer cell mediated cytotoxicity	1/118	0.866168	1	0	0	0.502942	0.0722608	H2-K1	Down
Neurotrophin signaling pathway	1/121	0.872859	1	0	0	0.490473	0.066695	ATF4	Down
Platelet activation	1/125	0.881264	1	0	0	0.474777	0.0600108	MYL12B	Down
AMPK signaling pathway	1/126	0.883277	1	0	0	0.471009	0.0584597	PRKAG2	Down
Inflammatory mediator regulation of TRP channels	1/127	0.885257	1	0	0	0.467301	0.0569535	CYP2J6	Down
Serotonergic synapse	1/132	0.894662	1	0	0	0.4496	0.0500447	CYP2J6	Down
Oxidative phosphorylation	1/134	0.898205	1	0	0	0.442889	0.0475472	NDUFA5	Down
Thermogenesis	2/231	0.903462	1	0	0	0.513828	0.0521645	NDUFA5;PRKAG2	Down
Parkinson disease	1/144	0.914216	1	0	0	0.412133	0.0369636	NDUFA5	Down
RNA transport	1/167	0.942147	1	0	0	0.355372	0.0211782	POP4	Down
Huntington disease	1/192	0.962316	1	0	0	0.3091	0.0118731	NDUFA5	Down
